# Supplementary material for: Oxidation of a two-dimensional hexagonal boron nitride monolayer: a first-principles study
Source: Royal Society of Chemistry journal article supplement (doi:10.1039/c2cp40081b), 2012-01-01
Supplement: c2cp40081b.pdf [file c2cp40081b.pdf]

## Supporting Information

### **Oxidation of Two-dimensional Hexagonal Boron Nitride Monolayer: a First-principles Study**

Yu Zhao<sup>1</sup>, Xiaojun Wu<sup>2\*</sup>, Jinlong Yang<sup>3</sup>, and Xiao Cheng Zeng<sup>1\*</sup>

<sup>1</sup>Department of Chemistry and Nebraska Center for Materials and Nanoscience, University of Nebraska-Lincoln, Lincoln, Nebraska 68588; <sup>2</sup> CAS Key Lab of Materials for Energy Conversion, Hefei National Lab for Physical Science at the Microscale, and Department of Material Sciences and Engineering, University of Science and Technology of China, Hefei, 230026, China; <sup>3</sup> Hefei National Lab for Physical Science at the Microscale, and Department of Chemical Physics, University of Science and Technology of China, Hefei, 230026, China.

Emails: xjwu@ustc.edu.cn, xzeng1@unl.edu

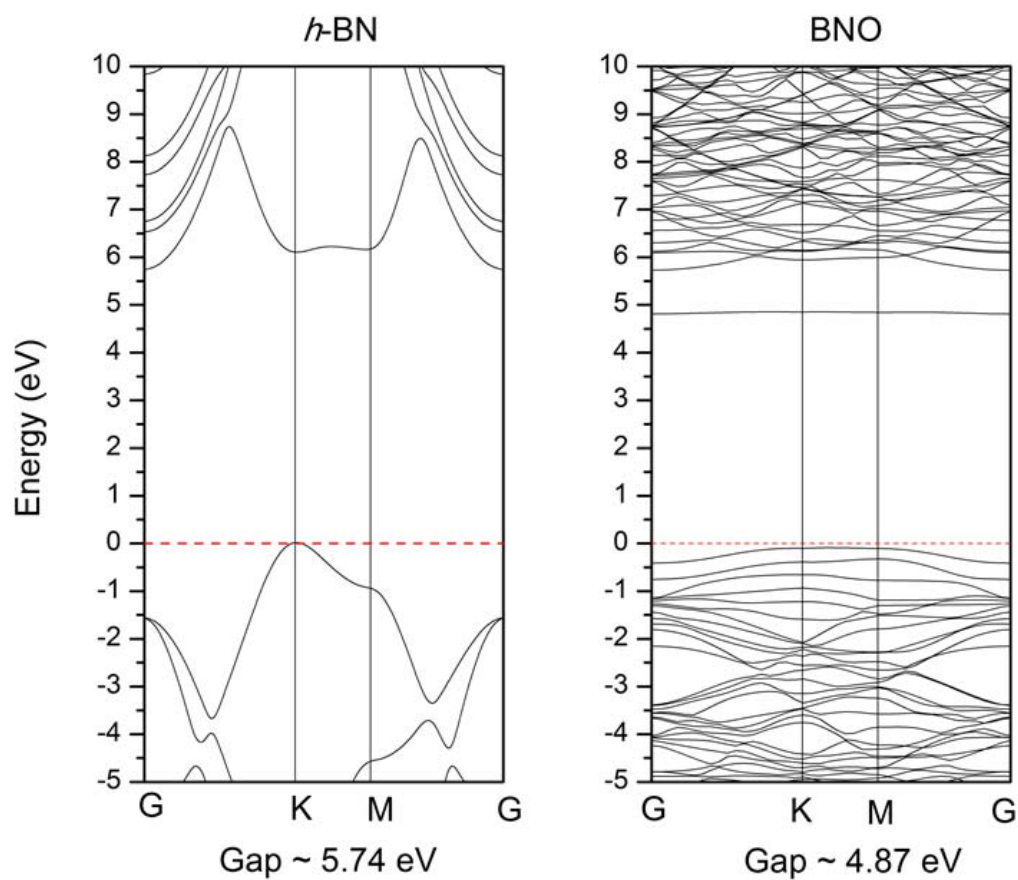

**Figure S1:** Calculated band structure of pristine *h*-BN sheet and *h*-BNO (i.e. chemisorption of atomic O per supercell on the *h*-BN sheet), by using the HSE06 hybrid functional implemented in the VASP package.

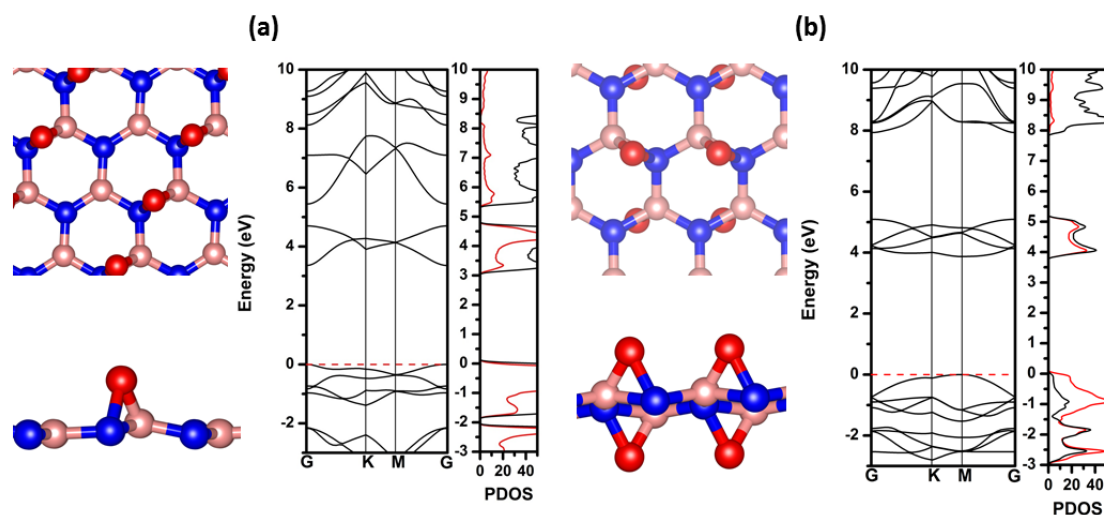

**Figure S2:** Top and side view of optimized structures of *h*-BN oxide with (a) 50% and (b) 100% atomic O coverage. The calculated band structures (PBE) and PDOS are shown in the right panel. The DOS projected on a single O atom and a B-N pair is plotted with red solid line and black solid line, respectively. The red dashed line denotes the Fermi level. Red, blue, pink spheres represent O, N, B, respectively.

**Table S1:** Relative energies per supercell ( $\Delta E$ ), adsorption energies of a single atomic O ( $E_{\text{ads}}$ ), B-N bond length (in the BNO ring,  $L_{\text{BN}}$ ), band gap ( $E_{\text{g}}$ ) of *h*-BN sheet with two chemisorbed O atoms (per supercell) either on single side (*ss*) or on both side (*bs*). (a) – (d) refer to chemisorption configurations shown in **Figure 2a-2d**.

|                      | $\Delta E$ (eV) | $E_{\text{ads}}$ (eV) | $L_{\text{BN}}$ (Å) | $E_{\text{g}}$ (eV) |
|----------------------|-----------------|-----------------------|---------------------|---------------------|
| <i>bs</i> -BN-O2 (a) | 0               | 2.34                  | 1.54                | 3.29                |
| <i>bs</i> -BN-O2 (c) | 0.02            | 2.33                  | 1.57, 1.58          | 3.16                |
| <i>ss</i> -BN-O2 (a) | 0.11            | 2.29                  | 1.59, 1.61          | 3.37                |
| <i>ss</i> -BN-O2 (b) | 0.14            | 2.27                  | 2.18                | 4.22                |
| <i>ss</i> -BN-O2 (c) | 0.20            | 2.24                  | 1.57, 1.59          | 3.07                |
| <i>bs</i> -BN-O2 (d) | 0.46            | 2.11                  | 1.60                | 2.99                |
| <i>ss</i> -BN-O2 (d) | 0.51            | 2.09                  | 1.60, 1.61          | 2.97                |
| <i>bs</i> -BN-O2 (b) | 0.64            | 2.02                  | 1.59                | 2.64                |
